# Supplementary material
Source: publisher figshare collection journal article supplement (https://tandf.figshare.com/ndownloader/files/14367722)
Supplement: Supplementary file 1 [file 14367722]

Supplement table 1. Effect of cysteine, initial pH and thermal on volatile compounds (µg/g) in MRPs. 110-90 indicated the sample was heated at 110 °C for 90 min. Others indicated the corresponding thermal treatment. ND indicated no detection.

| Compounds | Amouts (µg/g) | | | | | | | | | | | | | | | | | | | |
| --- | --- | --- | --- | --- | --- | --- | --- | --- | --- | --- | --- | --- | --- | --- | --- | --- | --- | --- | --- | --- |
| Cys  0g | Cys  0.05g | Cys  0.10g | Cys  0.15g | Cys  0.20g | Cys  0.25g | pH 6.5 | pH 7.0 | pH 7.5 | pH 8.0 | pH 8.5 | 110  -90 | 110  -120 | 110  -150 | 120  -90 | 120  -120 | 120  -150 | 130  -90 | 130  -120 | 130  -150 |
| **Furans** | **1.436** | **1.529** | **1.289** | **1.039** | **0.849** | **0.690** | **0.918** | **0.898** | **0.887** | **0.804** | **1.102** | **0.428** | **0.474** | **0.530** | **0.570** | **0.672** | **0.711** | **0.722** | **0.794** | **0.871** |
| Furan | ND | 0.006 | 0.016 | 0.030 | 0.052 | 0.065 | 0.030 | 0.031 | 0.032 | 0.033 | 0.034 | 0.030 | 0.036 | 0.042 | 0.046 | 0.045 | 0.049 | 0.051 | 0.052 | 0.053 |
| Furan,2-methyl | ND | 0.161 | 0.185 | 0.205 | 0.226 | 0.260 | 0.206 | 0.198 | 0.211 | 0.198 | 0.121 | 0.111 | 0.113 | 0.117 | 0.126 | 0.134 | 0.141 | 0.139 | 0.153 | 0.159 |
| Furan,3-methyl- | ND | ND | ND | ND | ND | ND | ND | ND | ND | ND | 0.053 | ND | 0.007 | 0.007 | 0.008 | 0.008 | 0.008 | 0.009 | 0.009 | 0.010 |
| Furan,2-ethyl- | 0.002 | ND | ND | ND | ND | ND | ND | ND | ND | ND | ND | ND | ND | 0.003 | ND | ND | 0.004 | 0.002 | 0.003 | 0.005 |
| Furan,2-pentyl- | 0.011 | 0.008 | 0.011 | 0.023 | 0.027 | 0.051 | 0.037 | 0.056 | 0.021 | 0.033 | 0.012 | 0.008 | 0.011 | 0.023 | 0.027 | 0.051 | 0.013 | 0.019 | 0.007 | 0.011 |
| Furan,3-phenyl- | ND | ND | ND | ND | 0.011 | 0.014 | ND | ND | 0.009 | 0.010 | 0.012 | ND | ND | ND | ND | 0.009 | 0.012 | 0.000 | 0.012 | 0.013 |
| Furfural | 1.400 | 1.343 | 1.077 | 0.759 | 0.533 | 0.300 | 0.634 | 0.613 | 0.614 | 0.530 | 0.800 | 0.273 | 0.307 | 0.338 | 0.363 | 0.418 | 0.460 | 0.497 | 0.545 | 0.605 |
| 3-Furaldehyde | 0.007 | ND | ND | ND | ND | ND | ND | ND | ND | ND | ND | ND | ND | ND | ND | ND | 0.004 | ND | 0.004 | 0.005 |
| Ethanone,1-(2-furanyl)- | 0.008 | 0.006 | ND | ND | ND | ND | 0.011 | ND | ND | ND | 0.070 | 0.006 | ND | ND | ND | ND | 0.011 | ND | ND | ND |
| 2,2'-Bifuran | 0.006 | 0.005 | ND | ND | ND | ND | ND | ND | ND | ND | ND | ND | ND | ND | ND | 0.005 | 0.006 | 0.005 | 0.006 | 0.007 |
| 1-Propanone,1-(2-furanyl)- | 0.002 | ND | ND | ND | ND | ND | ND | ND | ND | ND | ND | ND | ND | ND | ND | 0.002 | 0.003 | ND | 0.003 | 0.003 |
| 2,4(3H,5H)-Furandione,3-methyl- | ND | ND | ND | 0.022 | ND | ND | ND | ND | ND | ND | ND | ND | ND | ND | ND | ND | ND | ND | ND | ND |
| **Sulphur containing compounds** | **0** | **0.011** | **0.111** | **0.530** | **0.826** | **1.008** | **0.096** | **0.102** | **0.611** | **0.827** | **1.045** | **0.130** | **0.261** | **0.404** | **0.415** | **0.673** | **0.808** | **0.731** | **0.851** | **1.007** |
| **Thiophenes** | **0** | **0.008** | **0.074** | **0.109** | **0.142** | **0.132** | **0.070** | **0.073** | **0.079** | **0.092** | **0.089** | **0** | **0** | **0** | **0** | **0.071** | **0.068** | **0.089** | **0.069** | **0.078** |
| Thiophene,3-methyl- | ND | ND | 0.049 | 0.060 | 0.086 | 0.087 | 0.048 | 0.057 | 0.050 | 0.045 | 0.037 | ND | ND | ND | ND | 0.043 | 0.049 | 0.053 | 0.041 | 0.032 |
| 2-Thiophenecarboxaldehyde | ND | 0.008 | 0.016 | 0.006 | 0.008 | ND | 0.017 | 0.003 | 0.004 | 0.002 | 0.009 | ND | ND | ND | ND | 0.014 | 0.005 | 0.006 | 0.004 | 0.005 |
| 2,5-Thiophenedicarboxaldehyde | ND | ND | ND | 0.004 | ND | ND | ND | ND | ND | ND | ND | ND | ND | ND | ND | ND | ND | 0.007 | 0.008 | 0.013 |
| Thiophene | ND | ND | ND | 0.020 | 0.025 | 0.026 | ND | 0.013 | 0.017 | 0.027 | 0.030 | ND | ND | ND | ND | 0.010 | 0.014 | 0.017 | 0.002 | 0.011 |
| 3-Thiophene carboxaldehyde | ND | ND | ND | 0.008 | 0.014 | 0.019 | ND | ND | 0.008 | 0.011 | 0.013 | ND | ND | ND | ND | ND | ND | 0.006 | 0.007 | 0.010 |
| 3-Methyl-2-thiophenecarboxaldehyde | ND | ND | 0.009 | 0.011 | 0.009 | ND | 0.005 | ND | ND | 0.007 | ND | ND | ND | ND | ND | 0.004 | ND | ND | 0.007 | 0.007 |
| **Thiazoles** | **0** | **0** | **0** | **0** | **0.002** | **0.003** | **0** | **0** | **0** | **0** | **0** | **0** | **0** | **0** | **0** | **0** | **0.001** | **0** | **0.002** | **0.005** |
| 1,3-Thiazole | ND | ND | ND | ND | ND | 0.001 | ND | ND | ND | ND | ND | ND | ND | ND | ND | ND | 0.001 | ND | 0.001 | 0.002 |
| 5-Ethylthiazole | ND | ND | ND | ND | 0.001 | ND | ND | ND | ND | ND | ND | ND | ND | ND | ND | ND | ND | ND | 0.001 | 0.002 |
| Thiazole,4,5-dimethyl- | ND | ND | ND | ND | 0.001 | 0.002 | ND | ND | ND | ND | ND | ND | ND | ND | ND | ND | ND | ND | ND | 0.001 |
| **Thiols** | **0** | **0.003** | **0.024** | **0.075** | **0.123** | **0.182** | **0.026** | **0.029** | **0.049** | **0.066** | **0.093** | **0** | **0.056** | **0.060** | **0.058** | **0.069** | **0.082** | **0.073** | **0.087** | **0.095** |
| 2-Methyl-3-furanthiol | ND | 0.003 | 0.024 | 0.068 | 0.098 | 0.138 | 0.026 | 0.029 | 0.034 | 0.048 | 0.056 | ND | 0.056 | 0.060 | 0.058 | 0.060 | 0.070 | 0.072 | 0.074 | 0.080 |
| Methanethiol | ND | ND | ND | ND | 0.014 | 0.018 | ND | ND | 0.015 | 0.018 | 0.014 | ND | ND | ND | ND | 0.009 | 0.011 | ND | 0.011 | 0.012 |
| 2-Methyl-3-pentanethiol | ND | ND | ND | 0.007 | ND | 0.011 | ND | ND | ND | ND | 0.014 | ND | ND | ND | ND | ND | ND | ND | 0.001 | 0.001 |
| 3-Methoxybenzenethiol | ND | ND | ND | ND | 0.011 | 0.015 | ND | ND | ND | ND | 0.009 | ND | ND | ND | ND | ND | 0.001 | 0.001 | 0.001 | 0.002 |
| **Sulfur substituted furans** | **0** | **0** | **0.013** | **0.343** | **0.543** | **0.631** | **0** | **0** | **0.471** | **0.658** | **0.844** | **0.130** | **0.204** | **0.343** | **0.357** | **0.522** | **0.641** | **0.554** | **0.675** | **0.809** |
| Bis(2-furfuryl)disulfide | ND | ND | ND | ND | 0.002 | 0.001 | ND | ND | ND | ND | ND | ND | 0.001 | 0.001 | 0.001 | ND | 0.001 | 0.002 | 0.001 | 0.002 |
| Furan,2-[(methyldithio)methyl]- | ND | ND | ND | ND | 0.002 | 0.004 | ND | ND | ND | ND | ND | ND | ND | ND | 0.002 | 0.002 | 0.005 | 0.006 | 0.007 | 0.007 |
| 2-Furfurylthiol | ND | ND | 0.013 | 0.301 | 0.447 | 0.498 | ND | ND | 0.395 | 0.540 | 0.711 | 0.130 | 0.203 | 0.314 | 0.354 | 0.456 | 0.553 | 0.463 | 0.571 | 0.687 |
| 2-Methyl-3-furanthiol | ND | ND | ND | 0.025 | 0.050 | 0.072 | ND | ND | 0.042 | 0.064 | 0.064 | ND | ND | 0.026 | ND | 0.035 | 0.046 | 0.043 | 0.056 | 0.055 |
| Furfuryl mercaptan | ND | ND | ND | 0.017 | 0.042 | 0.056 | ND | ND | 0.034 | 0.054 | 0.069 | ND | ND | 0.002 | ND | 0.029 | 0.036 | 0.040 | 0.040 | 0.058 |
| **Aliphatic sulfur compounds** | **0** | **0** | **0** | **0.003** | **0.016** | **0.060** | **0** | **0** | **0.012** | **0.011** | **0.019** | **0** | **0.001** | **0.001** | **0** | **0.011** | **0.016** | **0.015** | **0.018** | **0.020** |
| Dimethyl disulfide | ND | ND | ND | ND | 0.006 | 0.025 | ND | ND | 0.003 | ND | 0.011 | ND | 0.001 | 0.001 | ND | 0.002 | 0.002 | 0.002 | 0.003 | 0.003 |
| Dimethyl trisulfide | ND | ND | ND | 0.003 | 0.010 | 0.035 | ND | ND | 0.009 | 0.011 | 0.008 | ND | ND | ND | ND | 0.009 | 0.014 | 0.013 | 0.015 | 0.017 |
| **Nitrogen containing compounds** | **0.089** | **0.059** | **0.030** | **0.035** | **0.048** | **0.014** | **0** | **0** | **0.053** | **0.038** | **0.062** | **0.010** | **0.029** | **0.054** | **0.042** | **0.071** | **0.098** | **0.120** | **0.141** | **0.146** |
| **Pyrroles** | **0.002** | **0.001** | **0** | **0** | **0** | **0.002** | **0** | **0** | **0.002** | **0.001** | **0.001** | **0** | **0.001** | **0.002** | **0.001** | **0.004** | **0.024** | **0.035** | **0.035** | **0.039** |
| 1H-Pyrrole,1-(2-furanylmethyl)- | ND | ND | ND | ND | ND | ND | ND | ND | ND | ND | ND | ND | 0.001 | 0.002 | 0.001 | 0.003 | 0.004 | 0.006 | 0.008 | 0.008 |
| 1H-Pyrrole, 1-methyl- | ND | ND | ND | ND | ND | ND | ND | ND | ND | ND | ND | ND | ND | ND | ND | 0.001 | ND | 0.002 | 0.001 | 0.002 |
| 2-Ethyl pyrrole | 0.002 | 0.001 | ND | ND | ND | ND | ND | ND | 0.001 | 0.001 | 0.001 | ND | ND | ND | ND | ND | 0.001 | 0.002 | 0.002 | 0.002 |
| 1-Furfuryl pyrrole | ND | ND | ND | ND | ND | 0.002 | ND | ND | 0.001 | ND | ND | ND | ND | ND | ND | ND | 0.019 | 0.025 | 0.024 | 0.027 |
| **Pyrazines** | **0.087** | **0.058** | **0.030** | **0.035** | **0.048** | **0.012** | **0** | **0** | **0.051** | **0.037** | **0.061** | **0.010** | **0.028** | **0.052** | **0.041** | **0.067** | **0.074** | **0.084** | **0.102** | **0.103** |
| Pyrazine | 0.027 | 0.021 | 0.012 | 0.024 | 0.031 | ND | ND | ND | 0.028 | 0.015 | 0.019 | 0.010 | 0.017 | 0.029 | 0.023 | 0.033 | 0.039 | 0.046 | 0.048 | 0.046 |
| Pyrazine,2-methyl- | 0.030 | 0.018 | 0.013 | 0.011 | 0.008 | ND | ND | ND | 0.012 | ND | 0.021 | ND | ND | 0.008 | ND | 0.011 | 0.012 | 0.014 | 0.018 | 0.017 |
| 2-Ethylpyrazine | 0.007 | ND | ND | ND | ND | ND | ND | ND | ND | 0.006 | ND | ND | 0.003 | 0.005 | 0.004 | 0.006 | 0.006 | 0.007 | 0.008 | 0.009 |
| Trimethyl pyrazine | 0.011 | ND | 0.005 | ND | 0.009 | 0.012 | ND | ND | 0.011 | 0.014 | 0.011 | ND | 0.008 | 0.010 | 0.012 | 0.013 | 0.014 | 0.016 | 0.018 | 0.017 |
| 3-Ethyl-2,5-dimethylpyrazine | ND | 0.010 | ND | ND | ND | ND | ND | ND | ND | 0.002 | ND | ND | ND | ND | 0.002 | 0.004 | 0.003 | 0.001 | 0.003 | 0.005 |
| Pyrazine,2-(n-propyl)- | 0.012 | 0.009 | ND | ND | ND | ND | ND | ND | ND | ND | 0.010 | ND | ND | ND | ND | ND | ND | ND | 0.007 | 0.009 |
| **Pyridines and pyrimidines** | **0** | **0** | **0** | **0** | **0** | **0** | **0** | **0** | **0** | **0** | **0** | **0** | **0** | **0** | **0** | **0** | **0** | **0.001** | **0.004** | **0.004** |
| Pyridine | ND | ND | ND | ND | ND | ND | ND | ND | ND | ND | ND | ND | ND | ND | ND | ND | ND | 0.001 | 0.002 | 0.002 |
| 4,6-Dimethyl-pyrimidine | ND | ND | ND | ND | ND | ND | ND | ND | ND | ND | ND | ND | ND | ND | ND | ND | ND | ND | 0.002 | 0.002 |
| **Oxygen containing compounds** | **0.154** | **0.117** | **0.158** | **0.274** | **0.320** | **0.259** | **0.122** | **0.217** | **0.259** | **0.236** | **0.208** | **0.307** | **0.305** | **0.31** | **0.471** | **0.486** | **0.515** | **0.554** | **0.611** | **0.695** |
| **Ketones** | **0.009** | **0.006** | **0.013** | **0.105** | **0.133** | **0.145** | **0.010** | **0.076** | **0.122** | **0.066** | **0.036** | **0.131** | **0.116** | **0.115** | **0.209** | **0.221** | **0.206** | **0.231** | **0.243** | **0.259** |
| 3-Hexanone | ND | ND | ND | 0.031 | 0.036 | ND | ND | ND | 0.025 | 0.018 | ND | 0.036 | 0.026 | 0.019 | 0.042 | 0.043 | 0.043 | 0.06 | 0.063 | 0.062 |
| 2-Heptanone | 0.004 | 0.006 | 0.013 | 0.028 | 0.029 | 0.030 | 0.010 | 0.023 | 0.013 | 0.013 | 0.036 | 0.023 | 0.013 | 0.013 | 0.029 | 0.03 | 0.01 | 0.006 | 0.013 | 0.028 |
| 2-Butanone,4-cyclopentylidene- | 0.005 | ND | ND | ND | ND | ND | ND | ND | ND | ND | ND | 0.009 | 0.008 | 0.007 | 0.011 | 0.009 | 0.008 | 0.013 | 0.011 | 0.009 |
| 1,3-Cyclopentanedione,2-butyl- | ND | ND | ND | ND | 0.002 | ND | ND | ND | ND | ND | ND | ND | ND | ND | 0.002 | ND | ND | 0.003 | 0.004 | ND |
| 3-(Methylthio)-2-butanone | ND | ND | ND | 0.046 | 0.066 | 0.115 | ND | 0.053 | 0.084 | 0.035 | ND | 0.063 | 0.069 | 0.076 | 0.125 | 0.139 | 0.145 | 0.149 | 0.152 | 0.16 |
| **Alcohols** | **0** | **0.007** | **0.020** | **0.038** | **0.038** | **0** | **0.016** | **0.014** | **0.017** | **0.023** | **0** | **0.046** | **0.037** | **0.027** | **0.066** | **0.055** | **0.055** | **0.074** | **0.08** | **0.085** |
| 1-Hexanol | ND | 0.007 | 0.020 | 0.034 | 0.038 | ND | 0.016 | 0.014 | 0.017 | 0.023 | ND | 0.046 | 0.037 | 0.027 | 0.058 | 0.055 | 0.055 | 0.063 | 0.067 | 0.072 |
| Eucalyptol | ND | ND | ND | 0.004 | ND | ND | ND | ND | ND | ND | ND | ND | ND | ND | 0.008 | ND | ND | 0.011 | 0.013 | 0.013 |
| **Esters** | **0** | **0** | **0** | **0.010** | **0.012** | **0.007** | **0** | **0** | **0.008** | **0.009** | **0.002** | **0.021** | **0.037** | **0.04** | **0.007** | **0.014** | **0.023** | **0** | **0** | **0** |
| Octanoic acid, ethyl ester | ND | ND | ND | 0.003 | 0.005 | 0.007 | ND | ND | ND | ND | 0.002 | 0.008 | 0.008 | 0.01 | ND | 0.006 | 0.006 | ND | ND | ND |
| Benzyl acetate | ND | ND | ND | 0.007 | ND | ND | ND | ND | ND | ND | ND | ND | 0.006 | 0.004 | ND | ND | ND | ND | ND | ND |
| Butyl acetate | ND | ND | ND | ND | ND | ND | ND | ND | ND | 0.009 | ND | 0.013 | 0.015 | 0.017 | ND | ND | 0.009 | ND | ND | ND |
| 2-Phenylethyl acetate | ND | ND | ND | ND | 0.007 | ND | ND | ND | 0.008 | ND | ND | ND | 0.008 | 0.009 | 0.007 | 0.008 | 0.008 | ND | ND | ND |
| **Aldehydes** | **0.145** | **0.104** | **0.125** | **0.121** | **0.137** | **0.107** | **0.096** | **0.127** | **0.112** | **0.138** | **0.170** | **0.109** | **0.115** | **0.128** | **0.189** | **0.196** | **0.231** | **0.249** | **0.288** | **0.351** |
| Butanal,3-methyl- | 0.049 | 0.032 | 0.029 | 0.025 | 0.025 | ND | 0.014 | 0.025 | 0.033 | 0.037 | 0.045 | 0.048 | 0.054 | 0.054 | 0.059 | 0.073 | 0.081 | 0.073 | 0.084 | 0.091 |
| Pentanal | 0.003 | ND | ND | ND | ND | ND | ND | ND | 0.002 | 0.003 | ND | 0.002 | ND | ND | 0.011 | 0.007 | ND | 0.015 | 0.019 | 0.024 |
| Octanal | 0.010 | 0.004 | ND | ND | ND | ND | ND | ND | ND | 0.007 | ND | ND | ND | 0.004 | ND | 0.007 | 0.015 | 0.017 | 0.022 | 0.025 |
| Acetaldehyde | 0.007 | ND | ND | ND | ND | ND | ND | ND | ND | ND | ND | ND | ND | ND | 0.011 | ND | ND | 0.015 | 0.008 | ND |
| Heptanal | 0.003 | 0.002 | 0.004 | ND | ND | ND | ND | 0.003 | ND | ND | 0.004 | 0.002 | ND | ND | 0.004 | ND | ND | 0.008 | ND | ND |
| Hexanal | 0.013 | 0.020 | 0.030 | 0.035 | 0.030 | 0.030 | 0.021 | 0.029 | 0.030 | 0.033 | 0.043 | 0.015 | ND | ND | 0.027 | 0.034 | 0.042 | 0.037 | 0.047 | 0.052 |
| Nonanal | 0.003 | 0.002 | 0.002 | 0.006 | ND | 0.010 | 0.002 | 0.003 | ND | ND | 0.003 | ND | ND | ND | ND | ND | 0.002 | 0.006 | 0.009 | 0.01 |
| Benzaldehyde | 0.046 | 0.036 | 0.053 | 0.053 | 0.075 | 0.063 | 0.052 | 0.067 | 0.043 | 0.052 | 0.070 | 0.04 | 0.061 | 0.066 | 0.054 | 0.075 | 0.082 | 0.06 | 0.091 | 0.116 |
| Benzeneacetaldehyde | 0.011 | 0.008 | 0.007 | ND | ND | ND | 0.007 | ND | 0.004 | 0.006 | 0.005 | ND | ND | 0.004 | ND | ND | 0.009 | 0.007 | 0.008 | 0.013 |
| Benzaldehyde,3,4-dimethyl- | ND | ND | ND | 0.002 | 0.005 | ND | ND | ND | ND | ND | ND | ND | ND | ND | 0.008 | ND | ND | ND | ND | 0.008 |
| Benzaldehyde,4-ethoxy- | ND | ND | ND | ND | 0.002 | 0.004 | ND | ND | ND | ND | ND | 0.002 | ND | ND | 0.015 | ND | ND | 0.011 | ND | 0.012 |
| **Others** | **0** | **0.001** | **0** | **0.002** | **0.025** | **0** | **0** | **0** | **0.018** | **0.002** | **0** | **0.012** | **0** | **0.032** | **0.027** | **0.016** | **0.007** | **0.015** | **0.031** | **0.051** |
| Heptane | ND | ND | ND | ND | 0.024 | ND | ND | ND | 0.018 | ND | ND | 0.003 | ND | 0.008 | 0.011 | 0.016 | ND | 0.015 | 0.031 | 0.024 |
| Caryophyllene | ND | 0.001 | ND | 0.002 | 0.001 | ND | ND | ND | ND | 0.002 | ND | 0.009 | ND | 0.024 | 0.016 | ND | 0.007 | ND | ND | 0.027 |
